# Supplementary material for: Emerging investigator series: mitigation of harmful algal blooms by electrochemical ozonation: from bench-scale studies to field applications
Source: Royal Society of Chemistry journal article supplement (doi:10.1039/d4ew00490f), 2024-01-01
Supplement: d4ew00490f1.pdf [file d4ew00490f1.pdf]

## Supporting Information

### **Mitigation of Harmful Algal Blooms by Electrochemical Ozonation: From Bench-scale Studies to Field Applications**

Shasha Yang,<sup>1,2</sup> Luz Estefanny Quispe Cardenas,<sup>1,2</sup> Athkia Fariha,<sup>1</sup> Nada Shetewi,<sup>3</sup> Victor Melgarejo Cazares,<sup>1,2</sup> Nanyang Yang,<sup>1</sup> Lewis McCaffrey,<sup>4</sup> Nicole Wright,<sup>4</sup> Michael R. Twiss,<sup>5</sup> Siwen Wang,<sup>1</sup> Stefan J. Grimberg,<sup>1</sup> and Yang Yang<sup>1\*</sup>

<sup>1</sup>Department of Civil and Environmental Engineering, Clarkson University, Potsdam, New York 13699, United States

<sup>2</sup>Institute for a Sustainable Environment, Clarkson University, Potsdam, New York 13699, United States

<sup>3</sup>Department of Chemical Engineering, The Cooper Union, New York, New York 10003, United States.

<sup>4</sup>New York State Department of Environmental Conservation, 625 Broadway, Albany, New York 12233, United States.

<sup>5</sup>Faculty of Science, Algoma University, Sault Ste. Marie, Ontario P6A 2G4, Canada.

\*Corresponding Author, Email: [yangyang@clarkson.edu](mailto:yangyang@clarkson.edu)

**Table S1.** Composition of the supporting electrolyte and lake water.

| Component                            | PBS | Lake Neatahwanta | Oneida Lake |
|--------------------------------------|-----|------------------|-------------|
| Chl-a (µg/L)                         | 100 | 105 ± 36         | 5.4 ± 1.4   |
| MC-LR (µg/L)                         | 1   | 3 ± 0.8          | BDL         |
| TOC (mg/L)                           | --  | 8.60             | 4.23        |
| pH                                   | 7.7 | 7.8              | 8.3         |
| Conductivity (µS/cm)                 | 329 | 801.5            | 377.2       |
| Cl <sup>-</sup> (mg/L)               | --  | 46.5             | 32.7        |
| Br <sup>-</sup> (mg/L)               | --  | BDL              | BDL         |
| NO <sub>3</sub> <sup>-</sup> (mg/L)  | --  | 11.0             | 1.8         |
| SO <sub>4</sub> <sup>2-</sup> (mg/L) | --  | 13.2             | 43.4        |
| PO <sub>4</sub> <sup>3-</sup> (mg/L) | 150 | BDL              | BDL         |

BDL: below detection limit. The detection limit of Br<sup>-</sup> and PO<sub>4</sub><sup>3-</sup> is 0.04 mg/L. The detection limit of MC-LR is 0.041 µg/L.

**Table S2.** Toxicity evaluation of influent (INF) and effluent (EFF) samples relative to the lab controls (CON) based on the fecundity of *Ceriodaphnia dubia* (invertebrate) and growth of *Pimephales promelas* (fish). Samples were collected during the treatment of lake Neatahwanta water. The treatment system was operated at 7 and 10 mA/cm<sup>2</sup>. Test dates and sample collection times were provided.

| Acute & Chronic Test Results        | 7 mA/cm <sup>2</sup> ; Aug 11, 2021 |                |                |                 |                 | 10 mA/cm <sup>2</sup> ; Aug 10, 2021 |                |                |                 |                 |
|-------------------------------------|-------------------------------------|----------------|----------------|-----------------|-----------------|--------------------------------------|----------------|----------------|-----------------|-----------------|
|                                     | CON                                 | INF<br>9:00 AM | EFF<br>9:00 AM | INF<br>12:00 PM | EFF<br>12:00 PM | CON                                  | INF<br>9:00 AM | EFF<br>9:00 AM | INF<br>12:00 PM | EFF<br>12:00 PM |
| 48 h Invertebrate Survival; n=10    | 100%                                | 100%           | 100%           | 100%            | 100%            | 100%                                 | 100%           | 100%           | 100%            | 100%            |
| 6 d Invertebrate Survival; n=10     | 100%                                | 100%           | 100%           | 100%            | 100%            | 100%                                 | 100%           | 100%           | 100%            | 100%            |
| 6 d Invertebrate Reproduction; n=10 | 18.1 ± 7.5                          | *12.7 ± 3.8    | 13.4 ± 4.6     | *10.1 ± 3.2     | *9.9 ± 5.4      | 19.4 ± 6.3                           | *7.20 ± 3.0    | *2.90 ± 2.1    | *8.10 ± 2.8     | *4.00 ± 3.4     |
|                                     |                                     |                |                |                 |                 |                                      |                |                |                 |                 |
| 48 h Fish Survival; n=4             | 100%                                | 100%           | 100%           | 100%            | 100%            | 100%                                 | 100%           | 100%           | 100%            | 100%            |
| 7 d Fish Survival; n=4              | 100%                                | 100%           | 100%           | 100%            | 100%            | 95%                                  | 100%           | 100%           | 97.5%           | 100%            |
| 7 d Fish Growth (mg); n=4           | 0.729 ± 0.085                       | 0.683 ± 0.44   | 0.687 ± 0.035  | 0.665 ± 0.085   | 0.774 ± 0.073   | 0.694 ± 0.069                        | 0.637 ± 0.061  | 0.729 ± 0.049  | 0.692 ± 0.060   | 0.730 ± 0.071   |

\* The data is significant at p=0.05 versus lab controls. The lower reproduction in INF may be attributed to existing toxicity in the HAB-impacted lake water.

**Table S3.** Toxicity evaluation of influent (INF) and effluent (EFF) samples relative to the lab controls (CON) based on the fecundity of *Ceriodaphnia dubia* (invertebrate) and growth of *Pimephales promelas* (fish). Samples were collected during the treatment of Oneida Lake water. The treatment system was operated at 6 and 7 mA/cm<sup>2</sup>. Test dates and sample collection times were provided.

| Acute & Chronic Test Results        |               | 6 mA/cm <sup>2</sup> ; Aug 22, 2022 |                | 7 mA/cm <sup>2</sup> ; Aug 22, 2022 |                |
|-------------------------------------|---------------|-------------------------------------|----------------|-------------------------------------|----------------|
|                                     | CON           | INF<br>8:50 AM                      | EFF<br>8:50 AM | INF<br>7:00 AM                      | EFF<br>7:00 AM |
| 48 h Invertebrate Survival; n=10    | 100%          | 100%                                | 100%           | 100%                                | 100%           |
| 6 d Invertebrate Survival; n=10     | 100%          | 100%                                | 100%           | 100%                                | 100%           |
| 6 d Invertebrate Reproduction; n=10 | 16.2 ± 4.6    | 13.9 ± 8.2                          | 16.2 ± 8.4     | *9.2 ± 7.0                          | 17.2 ± 8.8     |
|                                     |               |                                     |                |                                     |                |
| 48 h Fish Survival; n=4             | 100%          | 100%                                | 100%           | 100%                                | 100%           |
| 7 d Fish Survival; n=4              | 100%          | 100.0%                              | 100%           | 82.5%                               | 100%           |
| 7 d Fish Growth (mg); n=4           | 0.754 ± 0.040 | 0.976 ± 0.066                       | 0.986 ± 0.058  | 0.570 ± 0.19                        | 0.894 ± 0.071  |

\* The data is significant at p=0.05 versus lab controls. The lower reproduction in “INF 7:00 AM” sample may be attributed to existing toxicity in the HAB-impacted lake water.

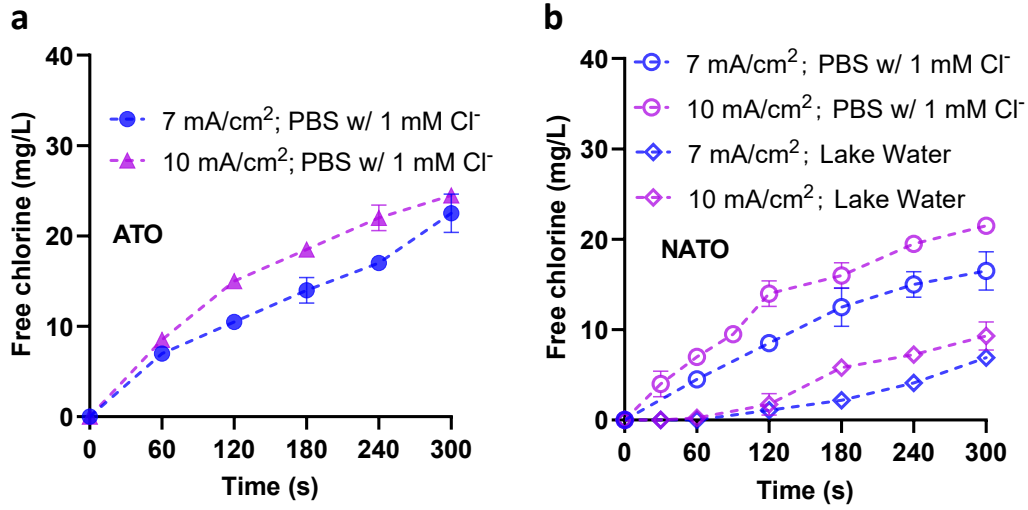

**Figure S1.** Evolution of free chlorine during electrolysis by (a) ATO and (b) NATO anodes in PBS containing 1 mM Cl<sup>-</sup> and lake water collected from Lake Neatahwanta.

Given that the formation of free chlorine/ozone increased linearly with electrolysis time, the free chlorine and ozone evolution rate was calculated in mmol/m<sup>2</sup>/s by the following equation,

$$\text{Chlorine or Ozone Evolution Rate} = (C \times V)/(A \times t) \quad (1)$$

where  $C$  is the concentration of free chlorine or ozone after electrolysis duration  $t$ ,  $V$  is the electrolyte volume, and  $A$  is the geometric surface area of the anode.

The current efficiency ( $CE$ ) was calculated by the chlorine or ozone production rates,

$$CE = \frac{nFVdC}{I dt} \times 100\% \quad (2)$$

Where  $n = 2$  for chlorine evolution from Cl<sup>-</sup> and  $n = 6$  for O<sub>3</sub> from oxidation of water,  $F$  is the Faraday constant (96486 C/mol),  $V$  is the electrolyte volume (L),  $C$  is the concentration of chlorine or O<sub>3</sub> (mol/L),  $I$  is the current (A), and  $t$  is the electrolysis time (s).

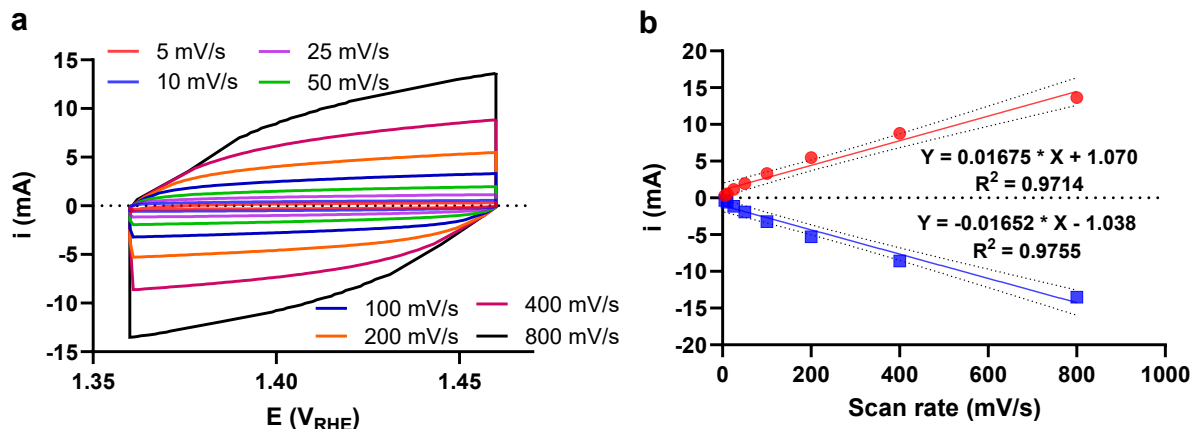

**Figure S2.** Electric double-layer capacitance measurement for NATO mesh electrode (5 cm x 5 cm). (a) Continuous cyclic voltammograms in a window of open circuit potential  $\pm 0.05$  V (non-Faradaic region) at different scan rates (5 – 800 mV/s). CVs were conducted in 100 mM NaClO<sub>4</sub> electrolyte. (b) Anodic (red line) and cathodic (blue line) charging currents ( $i$ ) obtained from Figure S2(a) as a function of scan rates ( $\nu$ ).

The double-layer capacitance ( $C_{DL}$ ) can be calculated by following equation,<sup>1</sup>

$$C_{DL} = i/\nu \quad (3)$$

which is the average slope in Figure S2(b), determined as 16.64 mF. The electrochemical active surface area (ECSA) can be further calculated by measured double-layer capacitance ( $C_{DL}$ ) and specific capacitance ( $C_s = 0.0375 \text{ mF/cm}^2$ ).<sup>1</sup>

$$ECSA = C_{DL}/C_s \quad (4)$$

The ECSA of mesh NATO anode is calculated as 443.6 cm<sup>2</sup>, which is 8.9 times larger than the geometric surface area (50 cm<sup>2</sup>).

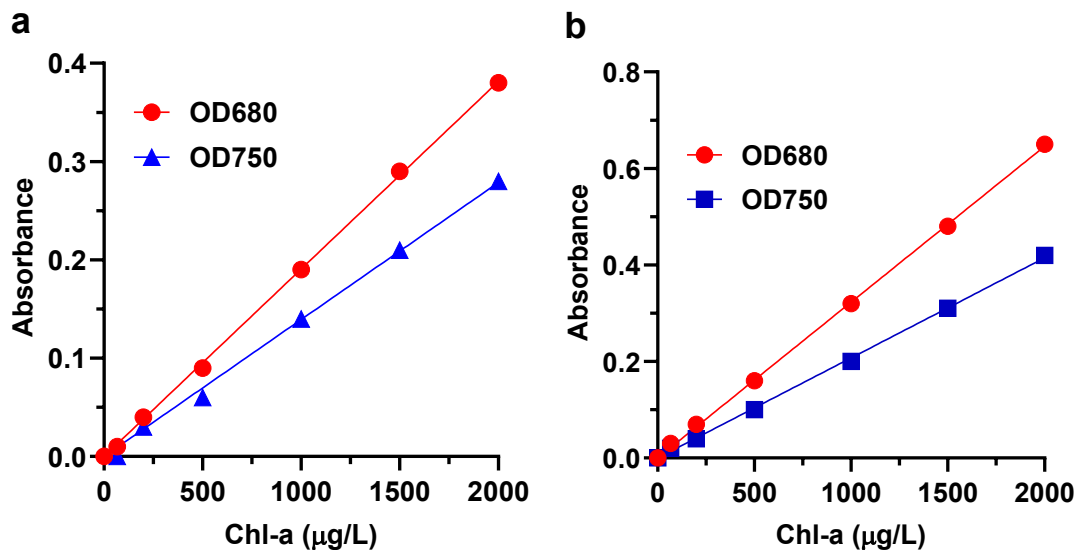

**Figure S3.** Correlation between optical density (OD) and chlorophyll-a (Chl-a) concentrations for (a) *Microcystis aeruginosa* and (b) *Synechococcus* cultures.

*Microcystis aeruginosa* and *Synechococcus* cultures were diluted by PBS electrolyte to reach different Chl-a concentrations. Light absorbance of these serially diluted samples was measured at 680 nm and 760 nm. The optical density at 680 nm (OD680) measures the direct absorbance of light by intracellular chlorophyll-a (Chl-a) molecules in live algae. Plotting the OD680 values (y-axis) against the Chl-a concentrations obtained after cell extraction (x-axis; see Methods section for details) reveals a linear correlation, thereby validating the accuracy of the Chl-a measurement method for quantifying viable algae cells. The optical density measurement at 750 nm (OD750) primarily represents the scattering of light by the cells rather than absorption by cellular pigments.<sup>2</sup> OD750 has been widely used to estimate algae cell density. The strong linear correlations between Chl-a concentrations and OD750 readings further validate that Chl-a can serve as a reliable proxy for representing cell density.

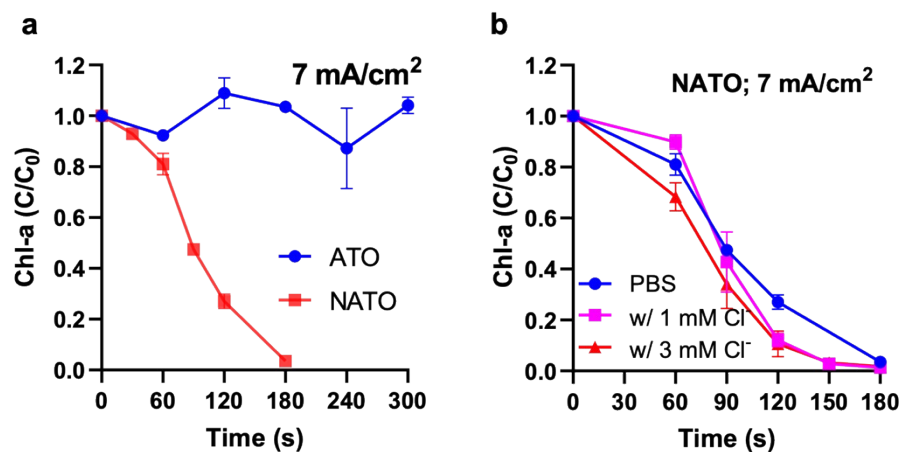

**Figure S4.** (a) Inactivation of *Synechococcus* by ATO and NATO electrodes in PBS electrolyte. (b) Effect of Cl<sup>-</sup> content on the destruction of Chl-a on NATO anode. All tests were conducted at 7 mA/cm<sup>2</sup>, the PBS electrolyte volume is 95 mL.

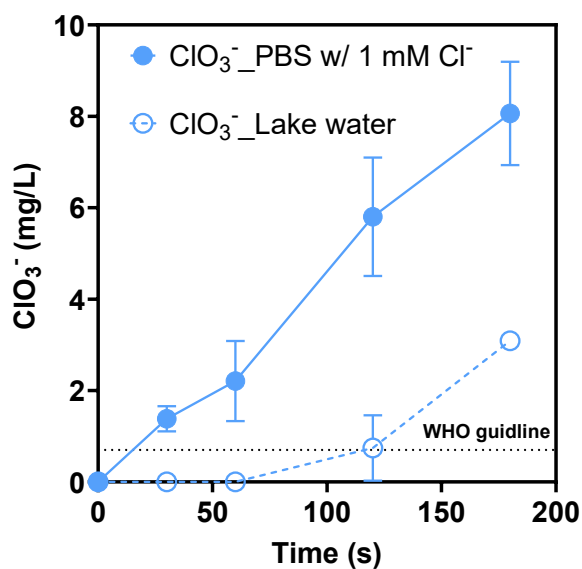

**Figure S5.** Chlorate (ClO<sub>3</sub><sup>-</sup>) formation during electrolysis in PBS solution spiked with 1 mM Cl<sup>-</sup> and lake water by NATO anode at 7 mA/cm<sup>2</sup>.

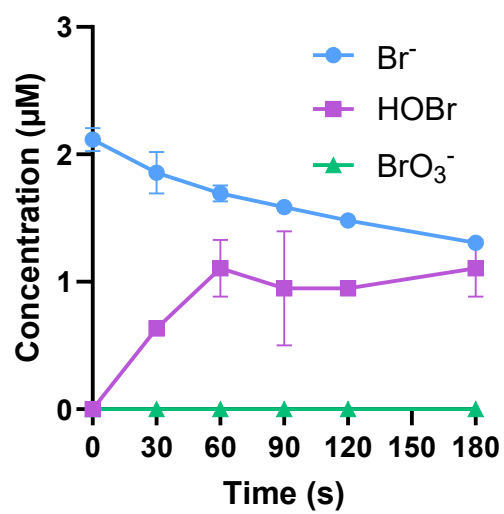

**Figure S6.** Transformation of  $\text{Br}^-$  in the electrolysis by NATO in PBS electrolyte amended with 0.2 mg/L KBr at 7 mA/cm<sup>2</sup>. Bromate ( $\text{BrO}_3^-$ ) was not detected (detection limit = 10 µg/L) throughout the reaction.

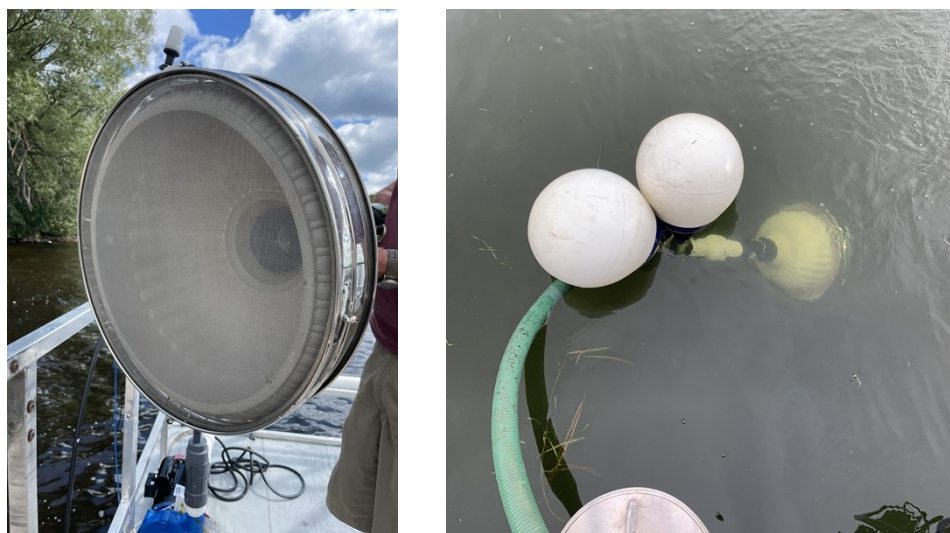

**Figure S7.** Pictures of the intake screen.

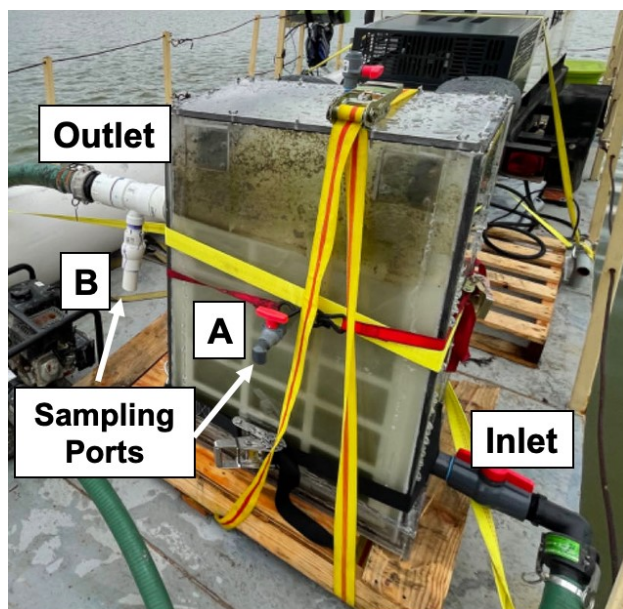

**Figure S8.** Picture of the full-scale ECO reactor. Samples from port A represent the bulk concentration in the reactor. Samples from port B are considered treated effluent.

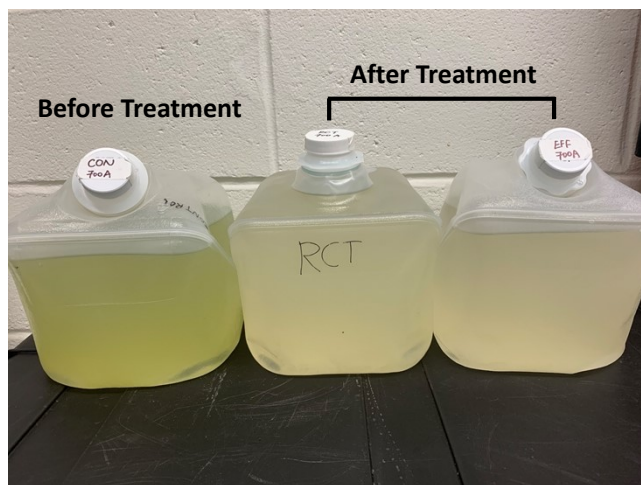

**Figure S9.** Pictures of influent and treated effluent water samples collected from the full-scale ECO treatment of Lake Neatahwanta water at a current density of 7 mA/cm<sup>2</sup>.
